# Supplementary material
Source: PubMed Central journal article supplement (PMC1173149)

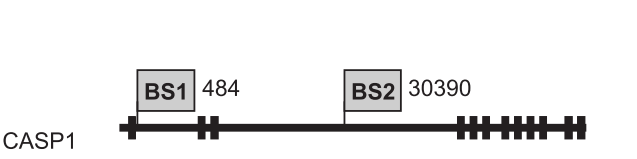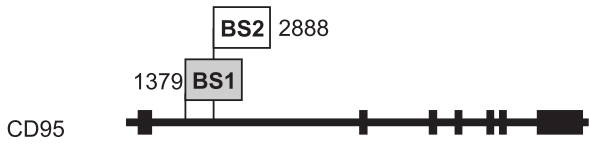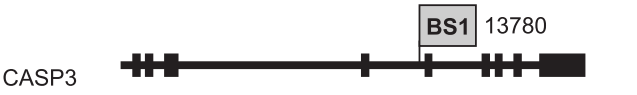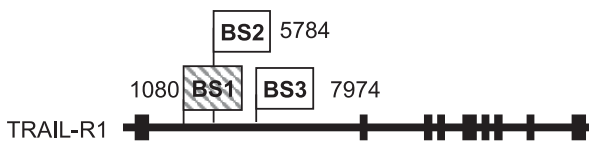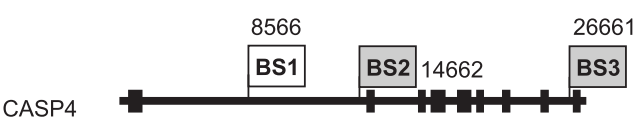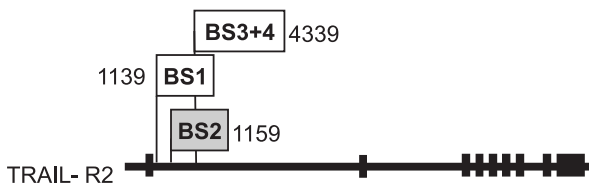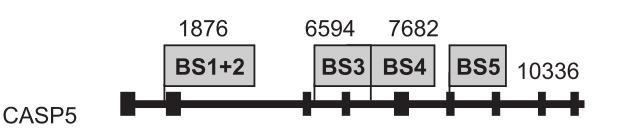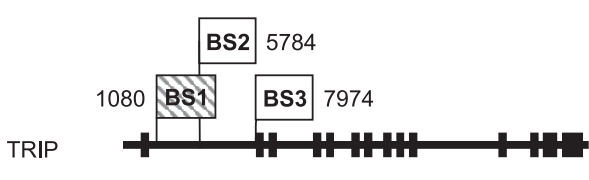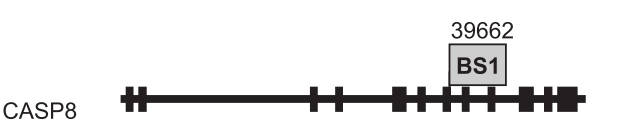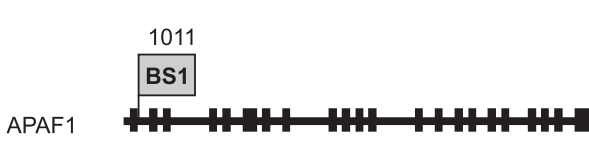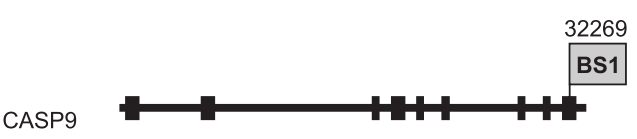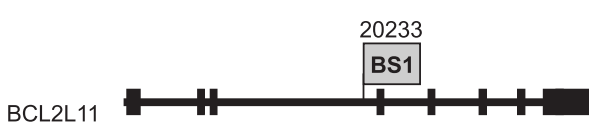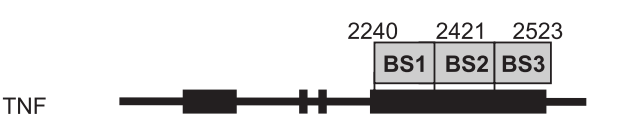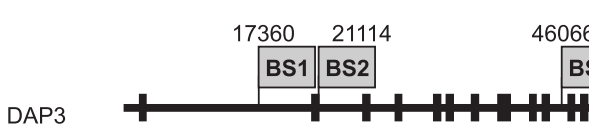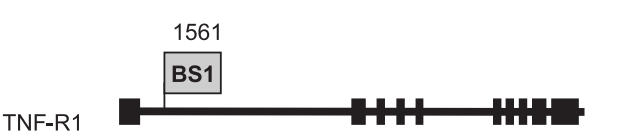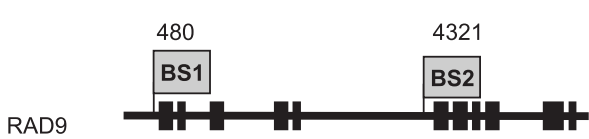

Supplement: 7600708s2.pdf [file 7600708s2.pdf]
